# Supplementary material for: Use of network model to explore dynamic and allosteric properties of three GPCR homodimers
Source: Royal Society of Chemistry journal article supplement (doi:10.1039/c6ra18243g), 2016-01-01
Supplement: c6ra18243g1.pdf [file c6ra18243g1.pdf]

## Supplementary data

### Use of Network Model to explore dynamic and allosteric properties of three GPCR homodimers

*Yuanyuan Jiang<sup>a</sup>, Yuan Yuan<sup>b</sup>, Xi Zhang<sup>a</sup>, Tao Liang<sup>a</sup>, Yanzhi Guo<sup>a</sup>, Menglong Li<sup>a</sup>,  
Xumei Pu<sup>a,\*</sup>*

<sup>a</sup> College of Chemistry, Sichuan University, Chengdu, 610064, P. R. China. E-mail:  
[xmpuscu@scu.edu.cn](mailto:xmpuscu@scu.edu.cn)

<sup>b</sup> College of Management, Southwest University for Nationalities, Chengdu, 610041,  
P. R. China.

**Table S1** Indexes of residues in the ligand-binding region and the G-protein binding one, which are severed as the two extremities to search PSN paths.

|                           | <b>CXCR4</b>                                                                           | <b><math>\beta</math>1AR</b>                                                                           | <b><math>\kappa</math>-OR</b>                                                                   |
|---------------------------|----------------------------------------------------------------------------------------|--------------------------------------------------------------------------------------------------------|-------------------------------------------------------------------------------------------------|
| <b>Extracellular side</b> | 93-94, 96-97, 112-113,<br>116, 199-200, 262, 281,<br>284-285, 288, 187, 181            | 101, 102, 117-118, 121-<br>122, 125, 207-208, 211,<br>215, 303, 306-307, 310,<br>325-326, 329-330, 333 | 108, 111, 115, 134, 138-<br>139, 142, 227,230,<br>A:287, 290-291, 294,<br>312, 316, 319-320     |
| <b>Intracellular side</b> | 73, 134, 137, 138, 139,<br>222, 225, 226, 233, 236,<br>237, 240, 241, 244, 298-<br>302 | 76, 139, 142, 143, 144,<br>230, 233, 234, 284, 287,<br>288, 291, 292, 295, 346,<br>339-343             | 94, 156, 159, 160, 161,<br>249, 252, 253, 265, 268,<br>271, 272, 275, 276, 279,<br>334, 326-330 |

**Table S2** Positions located in the meta-paths revealed by the work and simultaneously belonged to 36 positions in one conserved interaction network reported by Venkatakrishnan [64].

|              | monomer                                                                   | protomer                                                                                       |
|--------------|---------------------------------------------------------------------------|------------------------------------------------------------------------------------------------|
| CXCR4        | 7.39, 7.46, 7.45, 6.48, 6.44,<br>6.41, 3.51                               | 7.39, 7.46, 6.48, 6.51, 6.44,<br>7.45, 6.41                                                    |
| Beta1AR      | 7.39, 6.48, 6.44, 2.50 1.50<br>7.50 1.53, 1.57, 7.53, 2.43,<br>3.46, 7.45 | 7.39, 6.48, 6.44, 2.50 1.50<br>7.50 1.53, 1.57, 7.53, 3.46,<br>2.43, 2.42                      |
| $\kappa$ -OR | 6.51, 7.39, 6.48, 6.44, 3.40,<br>2.42, 3.46, 7.45, 7.53, 2.43             | 6.51, 7.39, 6.48, 6.44, 3.40,<br>3.44, 6.41, 5.54, 3.47, 5.57,<br>3.51, 5.54, 7.45, 7.53, 2.43 |

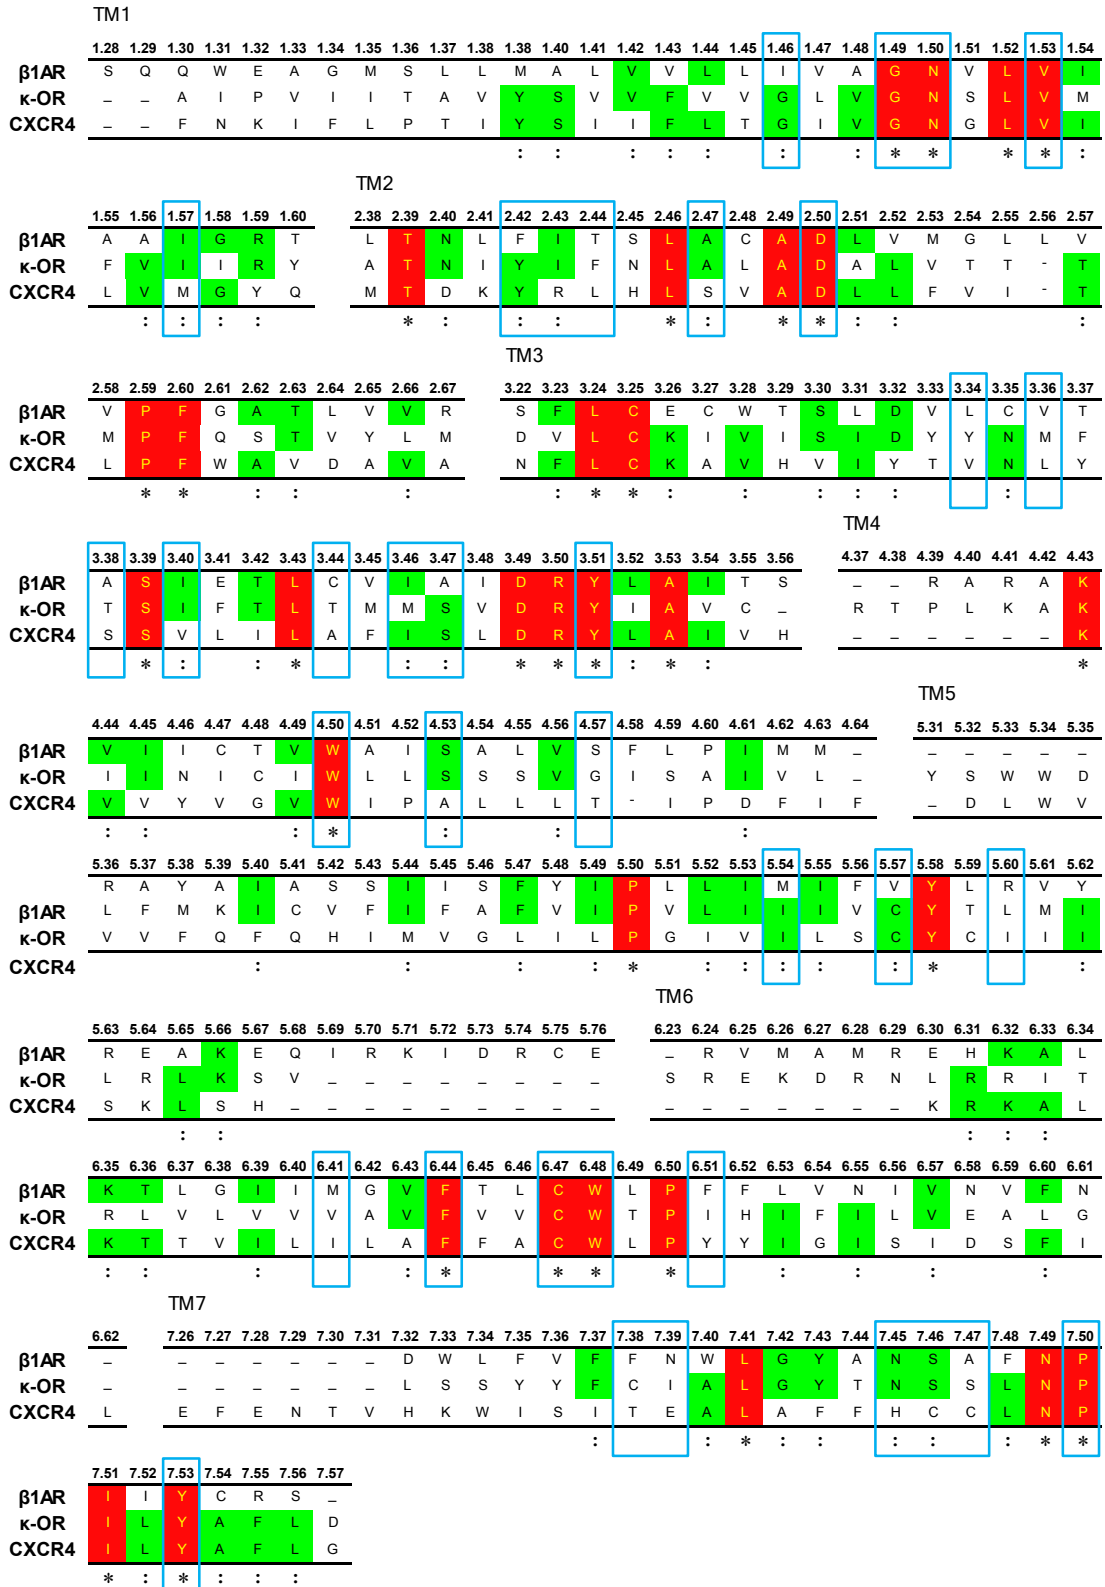

Fig.S1 Sequence alignment for the three GPCRs. Decimals are Ballesteros-Weinstein numbering. ‘\*’ and ‘:’ indicate identity and conservation, respectively. Positions located in the conserved interaction network reported<sup>64</sup> are highlighted by blue rectangles.
